# Supplementary material
Source: PubMed Central journal article supplement (PMC3646955)
Supplement: NIHMS459480-supplement-01.pdf [file NIHMS459480-supplement-01.pdf]

## Supplementary Material

# Domain Dissection and Characterization of the Aminoglycoside Resistance Enzyme ANT(3'')-Ii/AAC(6')-IId from *Serratia marcescens*

Keith D. Green<sup>b</sup> and Sylvie Garneau-Tsodikova<sup>a,b,\*</sup>

<sup>a</sup>Department of Medicinal Chemistry, <sup>b</sup>Life Sciences Institute, 210 Washtenaw Ave, University of Michigan, Ann Arbor, MI 48109-2216, U.S.A. (\*Corresponding author E-mail: sylviegt@umich.edu; Phone: 734-615-2736)

**Table S1:** Primers used for the PCR amplification of various constructs (full-length and truncated) of *ant(3'')-Ii/aac(6')-IId*

| gene                                  | 5' primer                               | 3' primer                         |
|---------------------------------------|-----------------------------------------|-----------------------------------|
| <i>ant(3'')-Ii/aac(6')-IId (NHis)</i> | TTAGACC <u>ATATG</u> AGTAACGCAG         | TCGATGCTCGAGTTAGGCATCCTGCG        |
| <i>ant(3'')-Ii/aac(6')-IId (CHis)</i> | TTAGACC <u>ATATG</u> AGTAACGCAG         | ATGGAA <u>CTCGAGGGC</u> ATCACTGCG |
| <i>aac(6')-IId(261-463) (NHis)</i>    | GCCACTC <u>CATATG</u> CTTGGTGCCCATGCC   | TCGATGCTCGAGTTAGGCATCCTGCG        |
| <i>aac(6')-IId(261-463) (CHis)</i>    | GCCACTC <u>CATATG</u> CTTGGTGCCCATGCC   | TCGATGCTCGAGTTAGGCATCCTGCG        |
| <i>aac(6')-IId(264-463) (NHis)</i>    | CTTGGTC <u>CATATG</u> CCAGTGATGTCTAAAAC | TCGATGCTCGAGTTAGGCATCCTGCG        |
| <i>aac(6')-IId(264-463) (CHis)</i>    | CTTGGTC <u>CATATG</u> CCAGTGATGTCTAAAAC | TCGATGCTCGAGTTAGGCATCCTGCG        |
| <i>aac(6')-IId(267-463) (NHis)</i>    | ATGCCAC <u>ATATG</u> TCTAAAACAAAGTTAG   | TCGATGCTCGAGTTAGGCATCCTGCG        |
| <i>aac(6')-IId(267-463) (CHis)</i>    | ATGCCAC <u>ATATG</u> TCTAAAACAAAGTTAG   | TCGATGCTCGAGTTAGGCATCCTGCG        |
| <i>ant(3'')-Ii(1-260) (CHis)</i>      | TTAGACC <u>ATATG</u> AGTAACGCAG         | CATGGCCTCGAGCAATTTAGTGGCTTC       |
| <i>ant(3'')-Ii(1-260) (NHis)</i>      | TTAGACC <u>ATATG</u> AGTAACGCAG         | TGGCATCTCGAGTCACAATTTAGTGGCTTC    |
| <i>ant(3'')-Ii(1-263) (CHis)</i>      | TTAGACC <u>ATATG</u> AGTAACGCAG         | CATCACCTCGAGGGCACCAAGCAATTTAG     |
| <i>ant(3'')-Ii(1-263) (NHis)</i>      | TTAGACC <u>ATATG</u> AGTAACGCAG         | AGACATCTCGAGTCAGGCACCAAGCAATTTAG  |
| <i>ant(3'')-Ii(1-266) (CHis)</i>      | TTAGACC <u>ATATG</u> AGTAACGCAG         | TGTCACCTCGAGCACTGGCATGGCACCAAG    |
| <i>ant(3'')-Ii(1-266) (NHis)</i>      | TTAGACC <u>ATATG</u> AGTAACGCAG         | CTTTGTCTCGAGTCACACTGGCATGGCACCAAG |

The introduced restriction sites are underlined for each primer. All of the 5' primers introduced an *NdeI* restriction site. All of the 3' primers introduced an *XhoI* restriction site.

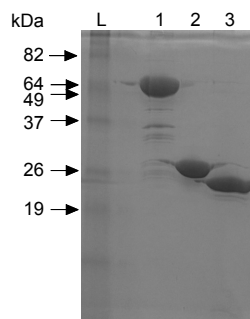

**Fig. S1.** Coomassie blue-stained 15% Tris-HCl SDS-PAGE gel showing the purified 55.0-kDa NHis<sub>10</sub>-tagged ANT(3'')-Ii/AAC(6')-IId (Lane 1), 30.3-kDa CHis<sub>6</sub>-tagged ANT(3'')-Ii(1-266) (Lane 2), and 24.0-kDa NHis<sub>6</sub>-tagged AAC(6')-IId(267-463) (Lane 3). L = BenchMark™ Pre-Stained Ladder from Invitrogen. 6 µg of each protein was loaded on the gel.

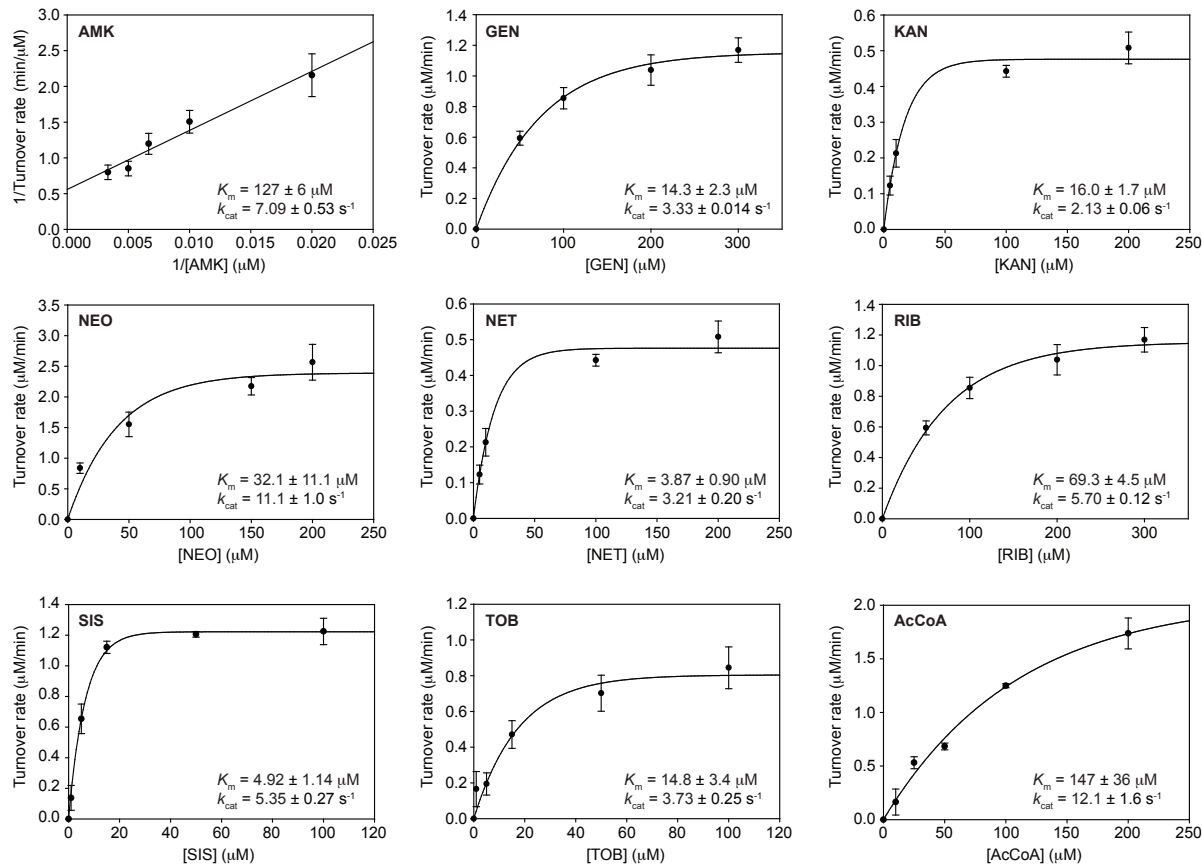

**Fig. S2.** Michaelis-Menten and Lineweaver-Burk kinetics for a variety of AGs and AcCoA during acetylation by AAC(6')-IId(267-463).

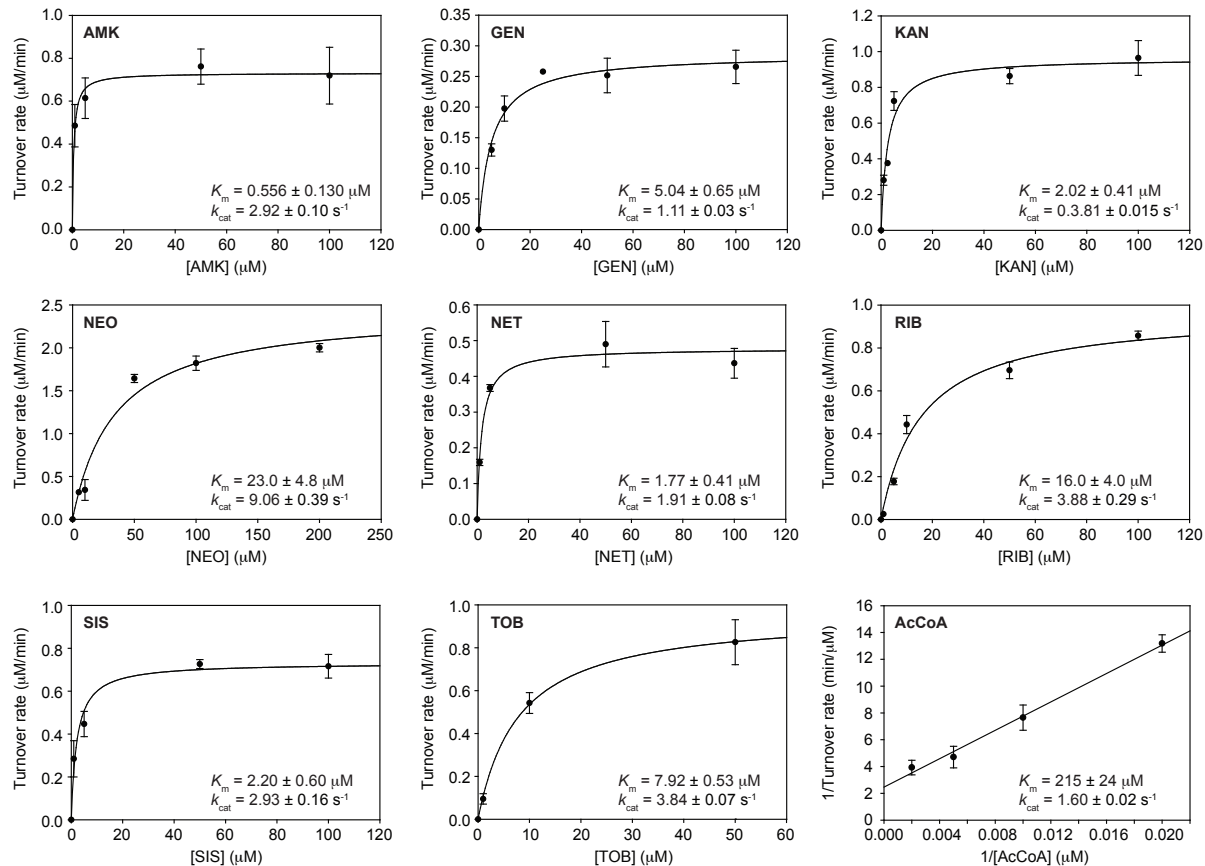

**Fig. S3.** Michaelis-Menten and Lineweaver-Burk kinetics for a variety of AGs and AcCoA during acetylation by ANT(3'')-Ii/AAC(6')-IId.

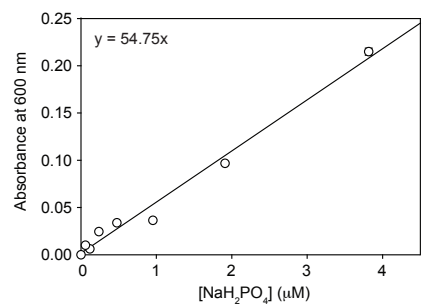

**Fig. S4.** Standard curve for  $P_i$  concentrations.

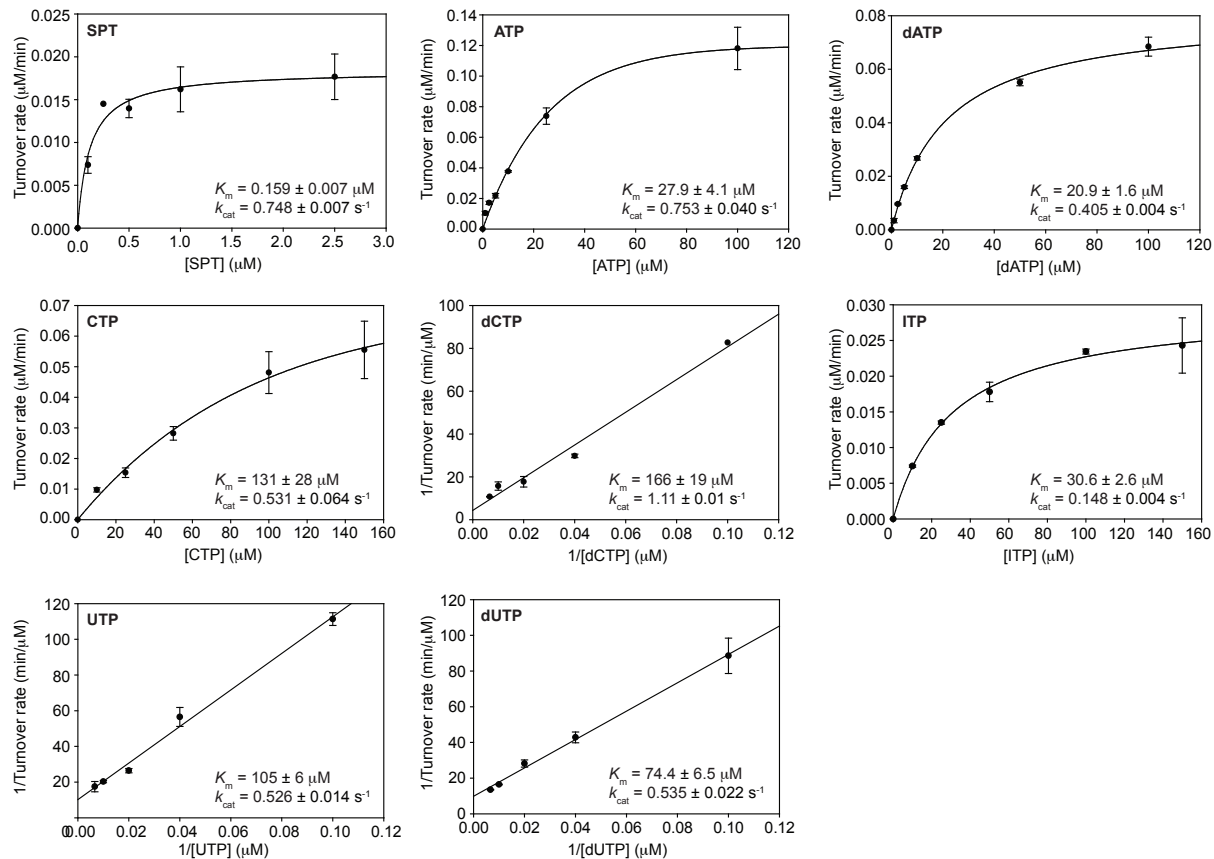

**Fig. S5.** Michaelis-Menten and Lineweaver-Burk kinetics for SPT as well as for a variety of NTPs and dNTPs during nucleotidylation by ANT(3'')-Ii/AAC(6')-IId.

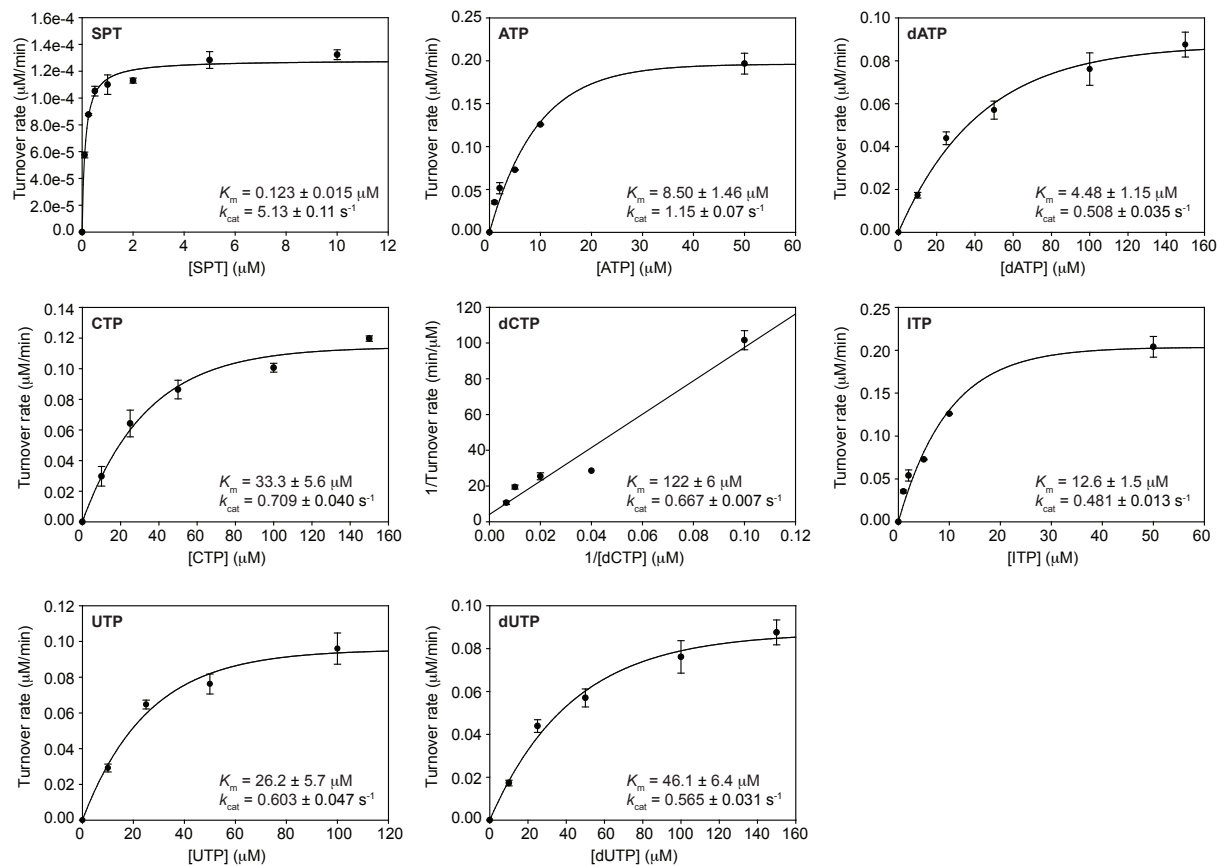

**Fig. S6.** Michaelis-Menten and Lineweaver-Burk kinetics for SPT as well as for a variety of NTPs and dNTPs during nucleotidylation by ANT(3'')-Ii(1-266).

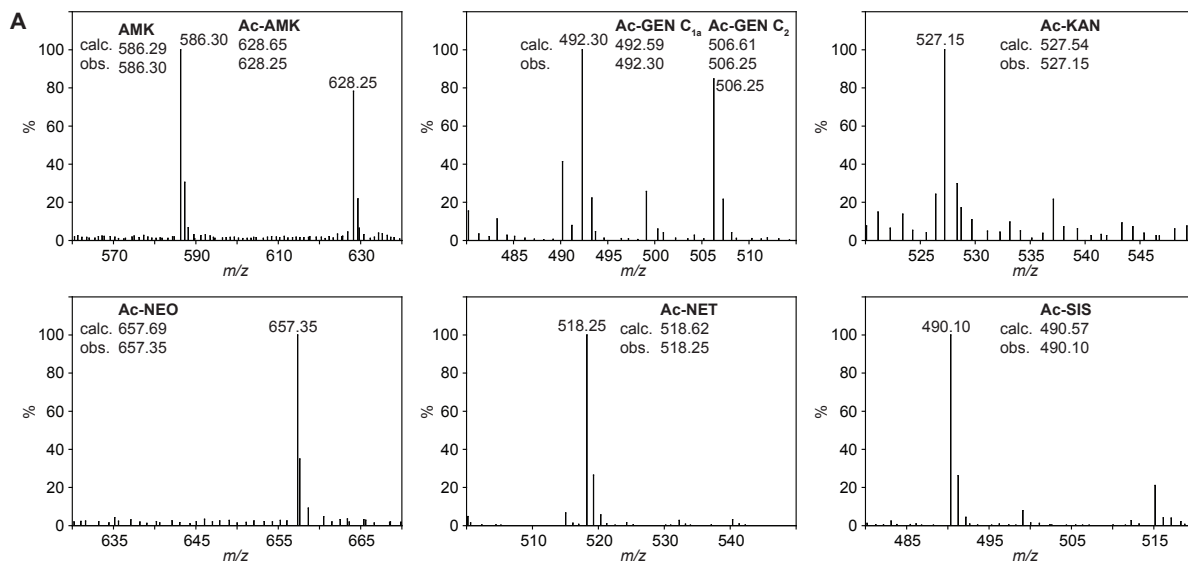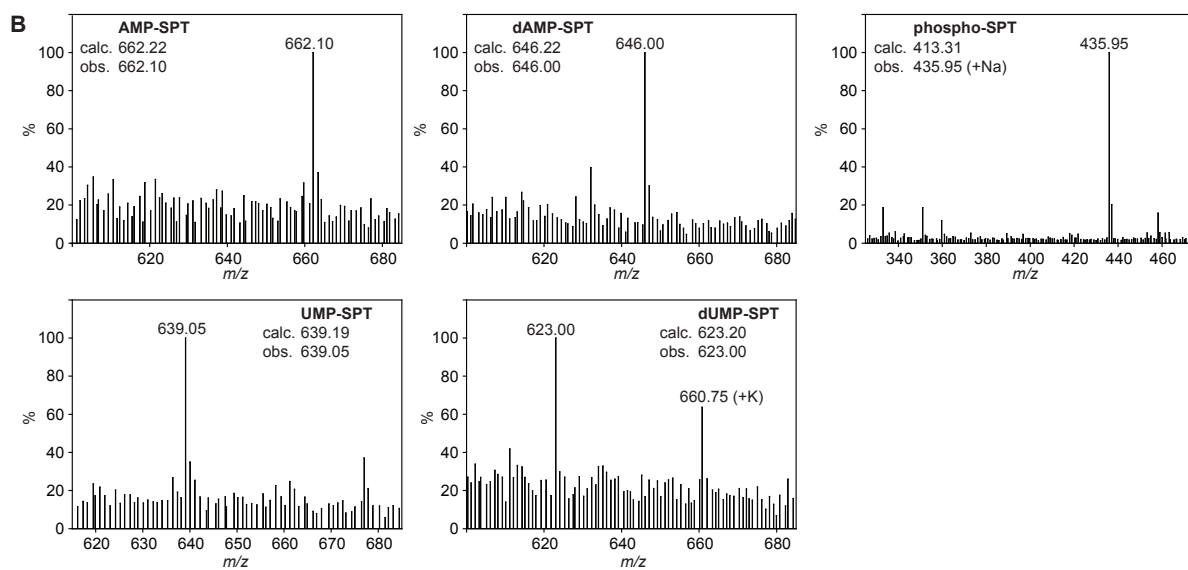

**Fig. S7.** Representative mass spectra for **A.** the acylation of various AGs, and **B.** nucleotidylation of SPT with various NTPs, dNTPs, and TP by ANT(3'')-Ii/AAC(6')-IId.
